# Supplementary material for: Discrete regions of the kinesin-8 Kip3 tail differentially mediate astral microtubule stability and spindle disassembly
Source: PubMed Central journal article supplement — Mol Biol Cell. 2018 Aug 1;29(15):1866–77. doi: 10.1091/mbc.E18-03-0199 (PMC6085823; doi:10.1091/mbc.e18-03-0199), 2018-08-01
Supplement: mbc-29-1866-s001.pdf [file mbc-29-1866-s001.pdf]

# Supplemental Materials

*Molecular Biology of the Cell*

Dave et al.

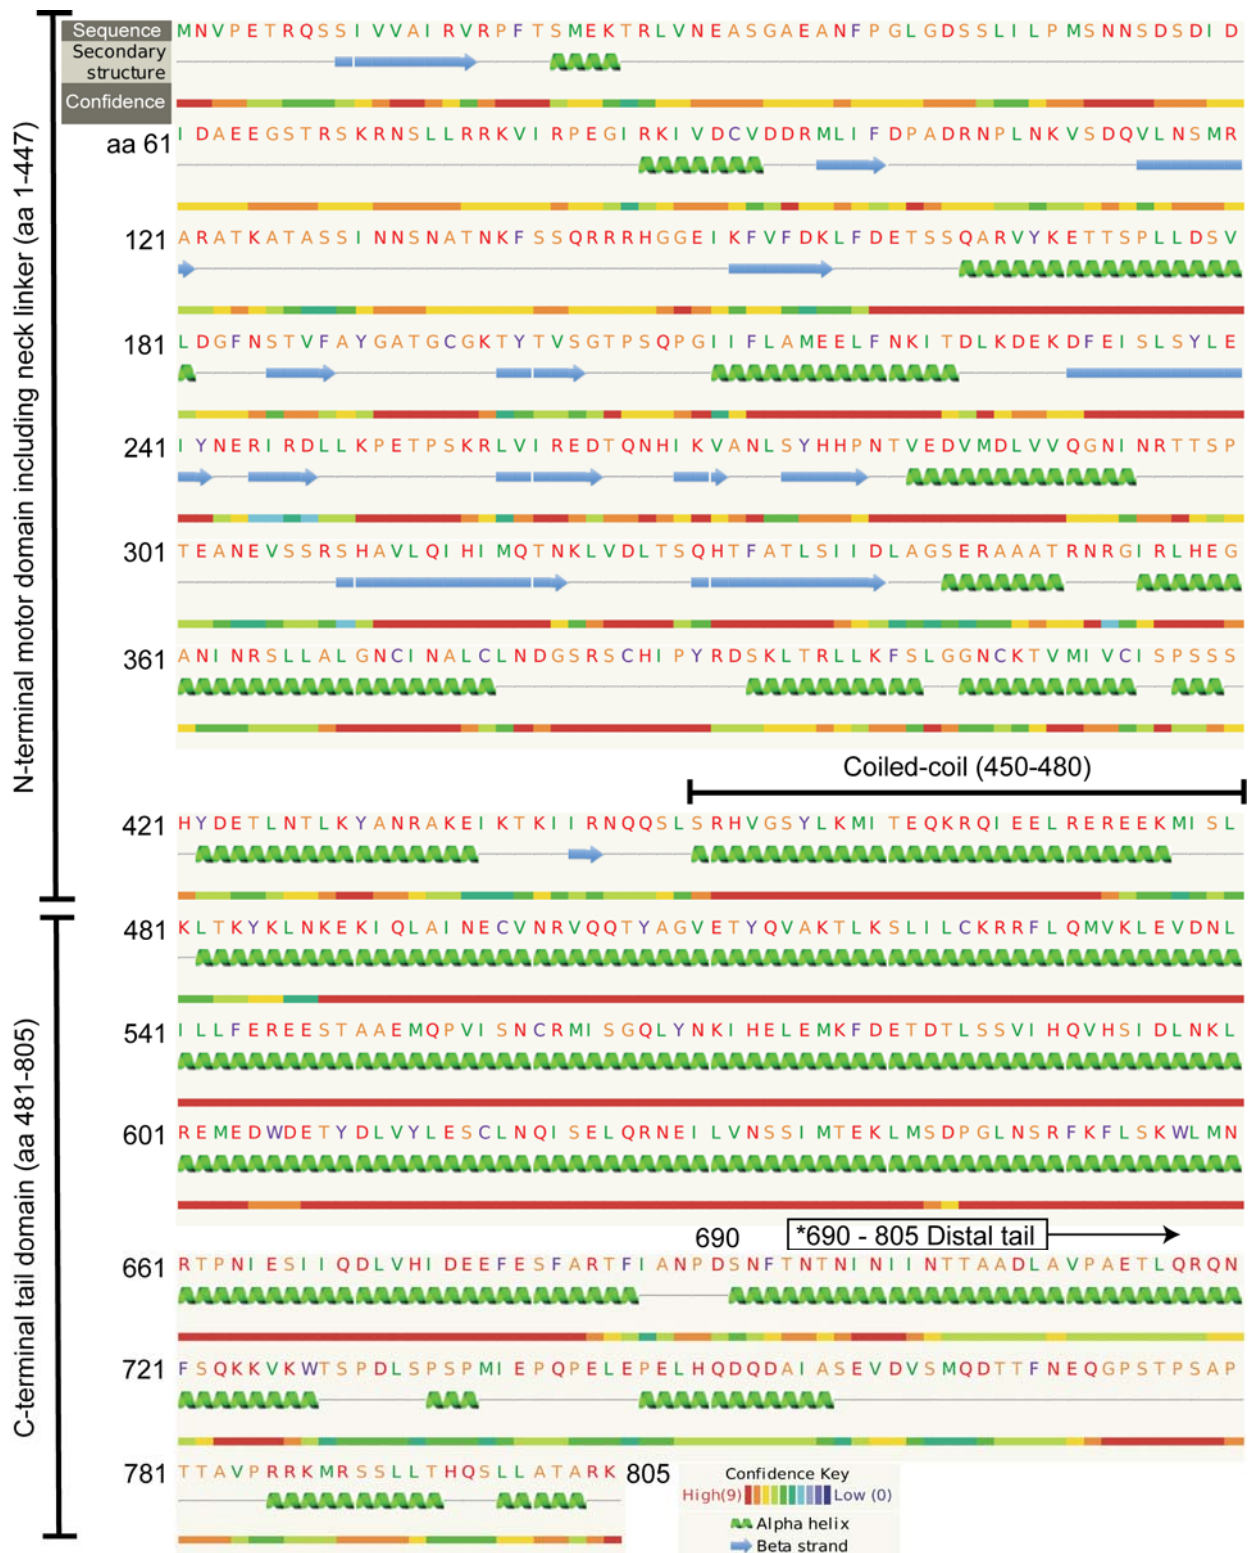

**Supplementary Figure S1.** Predicted secondary structure of Kip3. Major regions are denoted by black brackets. Beyond the motor and coiled-coil regions (1-480), the C-

terminal tail has two distinct regions. The proximal tail region (~481-690) is continuous  $\alpha$ -helix, while the distal region (~690-805) is comprised of shorter helices interspersed with less ordered sections. Numbers denote primary sequence (1-805). Structure prediction was performed using Phyre2 (Kelly et al.(2015). Nature Protocols 10(6):845-58).

**SupplementalTableS1.** Yeast strains and plasmids used in this study.

| Strain name | Relevant genotype                                                                                                                                    | Source        |
|-------------|------------------------------------------------------------------------------------------------------------------------------------------------------|---------------|
| MGY50       | <i>MATaura3-52 his3-<math>\Delta</math>200 leu2-<math>\Delta</math>1 trp1-<math>\Delta</math>63</i>                                                  |               |
| MGY142      | <i>MATaKIP3-13myc-HIS3 ura3-52 leu2-<math>\Delta</math>1 trp1-<math>\Delta</math>63 his3-<math>\Delta</math>200</i>                                  |               |
| MGY249      | <i>MATaKIP3-<math>\Delta</math>distal-13myc-HIS3ura3-52 leu2-<math>\Delta</math>1 trp1-<math>\Delta</math>63 his3-<math>\Delta</math>200</i>         |               |
| MGY256      | <i>MATaCFP-TUB1-URA3 KIP3-3YFP-LEU2 his3-<math>\Delta</math>200 trp1-<math>\Delta</math>63 leu2-<math>\Delta</math>1</i>                             |               |
| MGY258      | <i>MATaGFP-TUB1-URA3 his3-<math>\Delta</math>200 leu2-<math>\Delta</math>1 trp1-<math>\Delta</math>63</i>                                            |               |
| MGY276      | <i>MATaGFP-TUB1-URA3 kip3<math>\Delta</math>::KanMX his3-<math>\Delta</math>200 leu2-<math>\Delta</math>1 trp1-<math>\Delta</math>63</i>             |               |
| MGY 312     | <i>MAT<math>\alpha</math>kip3<math>\Delta</math>::KanMX ura3-52 his3-<math>\Delta</math>200 leu2-<math>\Delta</math>1 trp1-<math>\Delta</math>63</i> |               |
| MGY316      | <i>MATaGFP-TUB1-URA3 KIP3-<math>\Delta</math>distal-KanMX his3-<math>\Delta</math>200 leu2-<math>\Delta</math>1 trp1-<math>\Delta</math>63</i>       |               |
| MGY345      | <i>MATaCFP-TUB1-URA3 KIP3-<math>\Delta</math>distal-3YFP-LEU2 his3-<math>\Delta</math>200 leu2-<math>\Delta</math>1 trp1-<math>\Delta</math>63</i>   |               |
| MGY960      | <i>MATaGFP-TUB1-URA3 cdc15-2 his3-<math>\Delta</math>200 leu2<math>\Delta</math>1 trp1<math>\Delta</math>63</i>                                      | Rizk et al.   |
| MGY962      | <i>MATaGFP-TUB1-URA3 cdc15-2 kip3<math>\Delta</math>::KanMX his3-<math>\Delta</math>200 leu2<math>\Delta</math>1 trp1<math>\Delta</math>63</i>       | Rizk et al.   |
| MGY1556     | <i>MATaGFP-TUB1-LEU2 dyn1<math>\Delta</math>::TRP1 ura3-52 his3-<math>\Delta</math>200 trp1-<math>\Delta</math>63</i>                                | Fukuda et al. |

|         |                                                                                                    |                      |
|---------|----------------------------------------------------------------------------------------------------|----------------------|
| MGY1572 | <i>MATaGFP-TUB1-LEU2 dyn1Δ::TRP1 2xKIP3ΔT-LZ-KanMX ura3-52 his3-Δ200 trp1-Δ63</i>                  | Fukuda <i>et al.</i> |
| MGY1575 | <i>MATa GFP-TUB1-LEU2 KIP3ΔT-LZ ura3-52 his3-Δ200 trp1Δ63</i>                                      | Fukuda <i>et al.</i> |
| MGY1576 | <i>MATa GFP-TUB1-LEU2 2xKIP3ΔT-LZ-KanMX ura3-52 his3-Δ200 trp1Δ63</i>                              | Fukuda <i>et al.</i> |
| MGY1561 | <i>MATaKIP3ΔT-LZ ura3-52 his3-Δ200 leu2-Δ1 trp1-Δ63</i>                                            | Su <i>et al.</i>     |
| MGY1960 | <i>MATaGFP-TUB1-LEU2 cdc15-2-KanMX KIP3-Δdistal-TRP1 ura3-52 his3-Δ200 trp1-Δ63</i>                |                      |
| MGY2211 | <i>MATaGFP-TUB1-URA3 MYO1-GFP-TRP1 his3-Δ200 leu2-Δ1 trp1-Δ63</i>                                  |                      |
| MGY2209 | <i>MATaGFP-TUB1-URA3 MYO1-GFP-TRP1 doc1Δ::NatMX4 his3-Δ200 leu2-Δ1 trp1-Δ63</i>                    |                      |
| MGY2210 | <i>MATaGFP-TUB1-URA3 KIP3-Δdistal-KanMX MYO1-GFP-TRP1 doc1Δ::NatMX4 his3-Δ200 leu2-Δ1 trp1-Δ63</i> |                      |
| MGY2213 | <i>MATadyn1Δ::KanMX KIP3-Δdistal-3YFP-LEU2 CFP-TUB1-URA3 his3-Δ200 leu2-Δ1 trp1-Δ63</i>            |                      |
| MGY2214 | <i>MATadyn1Δ::KanMX KIP3-3YFP-LEU2 CFP-TUB1-URA3his3-Δ200 leu2-Δ1 trp1-Δ63</i>                     |                      |
| MGY2215 | <i>MATadyn1Δ::TRP1 ura3-52 his3-Δ200 leu2-Δ1 trp1-Δ63</i>                                          |                      |
| MGY2216 | <i>MATadyn1Δ::TRP1 KIP3-Δdistal-KanMX GFP-TUB1-LEU2 ura3-52 his3-Δ200 trp1-Δ63</i>                 |                      |

| Plasmid name | Description and markers                                                                                                                                                                                                                                                                                                                                                                   | Source                 |
|--------------|-------------------------------------------------------------------------------------------------------------------------------------------------------------------------------------------------------------------------------------------------------------------------------------------------------------------------------------------------------------------------------------------|------------------------|
| pAFS125      | <i>pTUB1-GFP-TUB1-URA3, ampR</i>                                                                                                                                                                                                                                                                                                                                                          | Straight <i>et al.</i> |
| pMG130       | <i>pTUB1-CFP-TUB1-URA3, ampR</i>                                                                                                                                                                                                                                                                                                                                                          |                        |
| pMG162       | <i>KIP3-Δdistal-3YFP-LEU2, ampR</i> (Plasmid containing 500 bp of <i>KIP3</i> coding sequence from aa 524 to 690 fused by a Gly-Ala-Gly-Ala-Gly-Asp-Pro-Val-Ala-Thr linker to 3 tandem copies of YFP followed by a stop codon. Linearization with Swal within the <i>KIP3</i> coding region prior to transformation will direct integration and truncation of endogenous Kip3 at aa 690.) |                        |

Fukuda Y, Luchniak A, Murphy ER, and Gupta ML Jr (2014). Spatial control of microtubule length and lifetime by opposing stabilizing and destabilizing functions of Kinesin-8. *CurrBiol* 24, 1826–1835.

Rizk RS, Discipio KA, Proudfoot KG, and Gupta ML Jr (2014). The kinesin-8 Kip3 scales anaphase spindle length by suppression of midzone microtubule polymerization. *J Cell Biol* 204, 965–975.

Straight AF, Marshall WF, Sedat JW, and Murray AW (1997). Mitosis in living budding yeast: anaphase A but no metaphase plate. *Science* 277, 574–578.

Su X, Qiu W, Gupta ML Jr., Pereira-Leal JB, Reck-Peterson SL, and Pellman D (2011). Mechanisms Underlying the Dual-Mode Regulation of Microtubule Dynamics by Kip3/Kinesin-8. *Mol Cell* 43, 751–763.
